# Supplementary material for: Establishing flood thresholds for sea level rise impact communication
Source: PubMed Central journal article supplement (PMC11102483; doi:10.1038/s41467-024-48545-1), 2024-05-18
Supplement: 41467_2024_48545_MOESM1_ESM.pdf [file 41467_2024_48545_MOESM1_ESM.pdf]

## Establishing flood thresholds for sea level rise impact communication

Sadaf Mahmoudi<sup>1,2\*</sup>, Hamed Moftakhari<sup>1,2\*</sup>, David F. Muñoz<sup>3</sup>, William Sweet<sup>4</sup>, Hamid Moradkhani<sup>1,2</sup>

1. Center for Complex Hydrosystems Research, The University of Alabama, Tuscaloosa, AL, USA
2. Department of Civil, Construction, and Environmental Engineering, The University of Alabama, Tuscaloosa, AL, USA
3. Department of Civil and Environmental Engineering, Virginia Tech, Blacksburg, VA, USA
4. NOAA/National Ocean Service, Silver Spring, MD, USA

\*Corresponding authors: [smahmoudikouhi@crimson.ua.edu](mailto:smahmoudikouhi@crimson.ua.edu); [hmoftakhari@ua.edu](mailto:hmoftakhari@ua.edu)

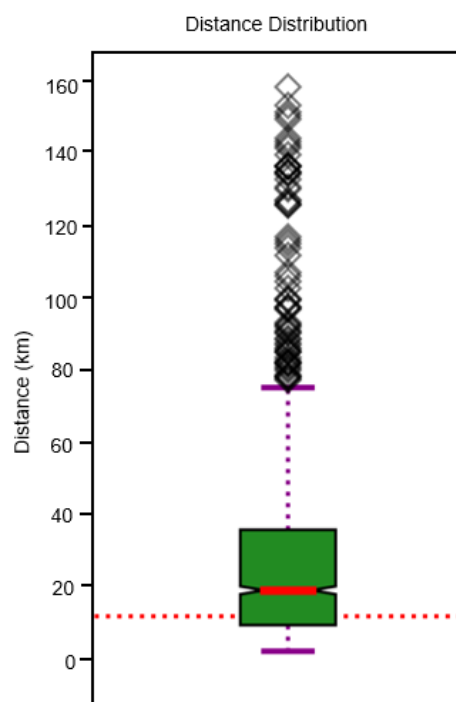

Figure S1. The boxplot of the distance between US coastal communities and their nearest tide gauge

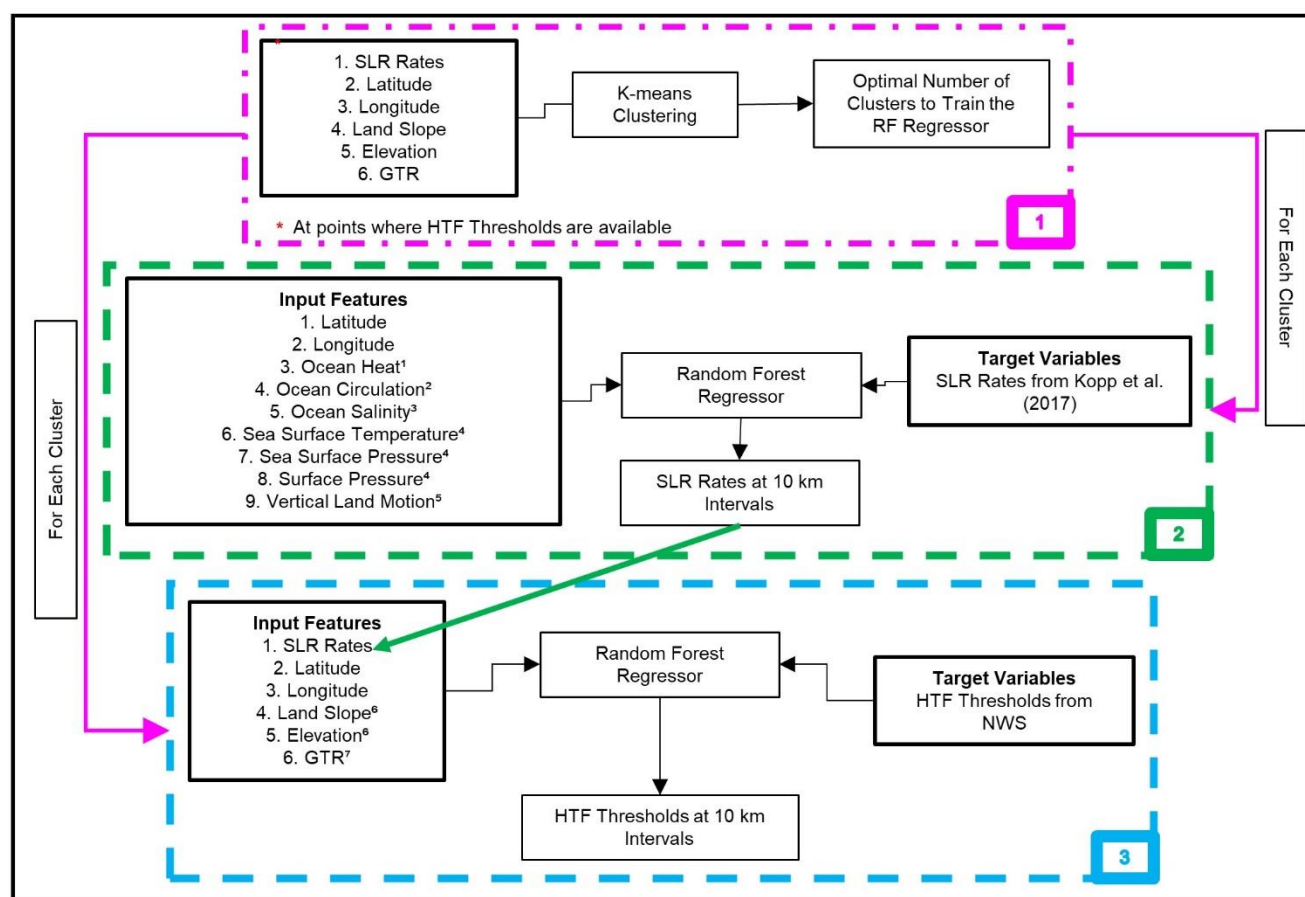

Figure S2. Flowchart of this study

Table S1. Characteristics of the input features used in ML algorithms.

| Name of Dataset                                      | Resolution    | Reference                                                                                                                       | Unit             | Dataset Title                                                  | URL                                                                                                                                                                                                                           |
|------------------------------------------------------|---------------|---------------------------------------------------------------------------------------------------------------------------------|------------------|----------------------------------------------------------------|-------------------------------------------------------------------------------------------------------------------------------------------------------------------------------------------------------------------------------|
| <sup>1</sup> Global Ocean Heat Content               | 1°×1°         | Improved estimates of ocean heat content from 1960 to 2015                                                                      | J/m <sup>2</sup> | IAP 2-D Ocean Heat Content using IAP T/S data                  | <a href="http://www.ocean.iap.ac.cn/pages/dataService/dataService.html?languageType=en&amp;navAnchor=dataService">http://www.ocean.iap.ac.cn/pages/dataService/dataService.html?languageType=en&amp;navAnchor=dataService</a> |
| <sup>2</sup> Ocean Circulation                       |               | Diagnostic Model and Analysis of the Surface Currents in the Tropical Pacific Ocean                                             | m/s              | OSCAR 1 degree ocean surface currents                          | <a href="https://podaac-tools.jpl.nasa.gov/drive/files/allData/oscar/L4/oscar_1_deg">https://podaac-tools.jpl.nasa.gov/drive/files/allData/oscar/L4/oscar_1_deg</a>                                                           |
| <sup>3</sup> Salinity                                | 1°×1°         | Provided by the NOAA PSL, Boulder, Colorado, USA, from their website at <a href="https://psl.noaa.gov">https://psl.noaa.gov</a> | kg/kg            | GODAS: Global Ocean Data Assimilation System                   | <a href="https://downloads.psl.noaa.gov/Datasets/godas/">https://downloads.psl.noaa.gov/Datasets/godas/</a>                                                                                                                   |
| <sup>4</sup> Sea level Pressure and Surface Pressure | 1°×1°         | NOAA National Centers for Environmental Information (NCEI)                                                                      | millibars        | International Comprehensive Ocean-Atmosphere Data Set          | <a href="https://cds.climate.copernicus.eu/cdsapp#!/dataset/reanalysis-era5-single-levels-monthly-means?tab=form">https://cds.climate.copernicus.eu/cdsapp#!/dataset/reanalysis-era5-single-levels-monthly-means?tab=form</a> |
| <sup>4</sup> Sea Surface Temperature                 | 1°×1°         | NOAA National Centers for Environmental Information (NCEI)                                                                      | degC             | International Comprehensive Ocean-Atmosphere Data Set (ICOADS) | <a href="https://cds.climate.copernicus.eu/cdsapp#!/dataset/reanalysis-era5-single-levels-monthly-means?tab=form">https://cds.climate.copernicus.eu/cdsapp#!/dataset/reanalysis-era5-single-levels-monthly-means?tab=form</a> |
| <sup>5</sup> Vertical Land Motion                    |               | A new global GPS dataset for testing and improving modeled GIA uplift rates                                                     | mm/a             | Vertical Land Motion (VLM)                                     | <a href="https://doi.pangaea.de/10.1594/PANGAEA.889923?format=textfile">https://doi.pangaea.de/10.1594/PANGAEA.889923?format=textfile</a>                                                                                     |
| <sup>6</sup> Greater Tide Range                      | 10 Km         | White, S. A. (2013). VDatum: Vertical Datum Transformation Tool. Presented to the Hydrographic Services Review Panel.           | m                | Vertical Datum Transformation                                  | <a href="https://vdatum.noaa.gov/vdatumweb/">https://vdatum.noaa.gov/vdatumweb/</a>                                                                                                                                           |
| <sup>7</sup> Land Slope                              | 15 arc-second | Derived by GEBCO DEMs (GEBCO Compilation Group (2022) GEBCO_2022 Grid (doi:10.5285/e0f0bb80-ab44-2739-e053-6c86abc0289c)_       | degree           | -                                                              | <a href="https://www.gebco.net/data_and_products/gridded_bathymetry_data/">https://www.gebco.net/data_and_products/gridded_bathymetry_data/</a>                                                                               |
| <sup>7</sup> Elevation                               | 15 arc-second | Derived by GEBCO DEMs (GEBCO Compilation Group (2022) GEBCO_2022 Grid (doi:10.5285/e0f0bb80-ab44-2739-e053-6c86abc0289c)_       | degree           | -                                                              | <a href="https://www.gebco.net/data_and_products/gridded_bathymetry_data/">https://www.gebco.net/data_and_products/gridded_bathymetry_data/</a>                                                                               |

Table S2. Parameters of SLR ML algorithms.

| SLR Rates                |                |                      |               |
|--------------------------|----------------|----------------------|---------------|
|                          |                | number of estimators | maximum depth |
| RCP 4.5, 5th Percentile  | West Coast     | 140                  | 10            |
|                          | Gulf/SE Coasts | 100                  | 10            |
|                          | NE Coast       | 140                  | 10            |
| RCP 4.5, 50th Percentile | West Coast     | 120                  | 10            |
|                          | Gulf/SE Coasts | 90                   | 9             |
|                          | NE Coast       | 140                  | 10            |
| RCP 4.5, 95th Percentile | West Coast     | 150                  | 10            |
|                          | Gulf/SE Coasts | 160                  | 10            |
|                          | NE Coast       | 160                  | 10            |
| RCP 8.5, 5th Percentile  | West Coast     | 130                  | 10            |
|                          | Gulf/SE Coasts | 100                  | 9             |
|                          | NE Coast       | 140                  | 10            |
| RCP 8.5, 50th Percentile | West Coast     | 140                  | 10            |
|                          | Gulf/SE Coasts | 100                  | 9             |
|                          | NE Coast       | 140                  | 10            |
| RCP 8.5, 95th Percentile | West Coast     | 120                  | 10            |
|                          | Gulf/SE Coasts | 100                  | 9             |
|                          | NE Coast       | 130                  | 9             |

Table S3. Evaluation metrics of SLR ML algorithms under different scenarios.

| percentile | Cluster | RCP 4.5 |           |      |      | RCP 8.5 |           |      |      |
|------------|---------|---------|-----------|------|------|---------|-----------|------|------|
|            |         | MAE     | R Squared | NSE  | KGE  | MAE     | R Squared | NSE  | KGE  |
| 5          | First   | 0.29    | 0.92      | 0.92 | 0.86 | 0.16    | 0.94      | 0.94 | 0.9  |
|            | Second  | 0.1     | 1         | 1    | 0.97 | 0.1     | 0.99      | 0.99 | 0.97 |
|            | Third   | 0.05    | 0.99      | 0.99 | 0.98 | 0.11    | 0.97      | 0.97 | 0.96 |
| 50         | First   | 0.17    | 0.95      | 0.95 | 0.93 | 0.11    | 0.97      | 0.97 | 0.95 |
|            | Second  | 0.11    | 0.99      | 0.99 | 0.97 | 0.1     | 0.99      | 0.99 | 0.97 |
|            | Third   | 0.08    | 0.97      | 0.97 | 0.96 | 0.09    | 0.97      | 0.97 | 0.95 |
| 95         | First   | 0.16    | 0.96      | 0.96 | 0.94 | 0.1     | 0.98      | 0.98 | 0.96 |
|            | Second  | 0.13    | 0.99      | 0.99 | 0.97 | 0.11    | 0.99      | 0.99 | 0.97 |
|            | Third   | 0.08    | 0.96      | 0.96 | 0.95 | 0.11    | 0.96      | 0.96 | 0.95 |

Table S4. Feature importance of SLR ML algorithms under different scenarios.

| percentile | Cluster | RCP 4.5  |           |             |                   |          |                      |                  |                         |                      |
|------------|---------|----------|-----------|-------------|-------------------|----------|----------------------|------------------|-------------------------|----------------------|
|            |         | Latitude | Longitude | Global Heat | Ocean Circulation | Salinity | Sea surface Pressure | Surface Pressure | Sea Surface Temperature | Vertical Land Motion |
| 5          | First   | 0.21     | 0.07      | 0.07        | 0.25              | 0.21     | 0.04                 | 0.03             | 0.03                    | 0.08                 |
|            | Second  | 0.01     | 0.11      | 0.04        | 0.8               | 0        | 0                    | 0                | 0.02                    | 0.01                 |
|            | Third   | 0.58     | 0.01      | 0.05        | 0.02              | 0.08     | 0.06                 | 0.06             | 0.07                    | 0.06                 |
| 50         | First   | 0.25     | 0.1       | 0.11        | 0.11              | 0.16     | 0.05                 | 0.05             | 0.02                    | 0.14                 |
|            | Second  | 0.01     | 0.09      | 0.05        | 0.79              | 0.04     | 0                    | 0                | 0.02                    | 0.01                 |
|            | Third   | 0.29     | 0.02      | 0.09        | 0.02              | 0.04     | 0.04                 | 0.13             | 0.12                    | 0.25                 |
| 95         | First   | 0.28     | 0.09      | 0.11        | 0.13              | 0.12     | 0.06                 | 0.06             | 0.02                    | 0.14                 |
|            | Second  | 0.01     | 0.09      | 0.04        | 0.8               | 0.04     | 0                    | 0                | 0.02                    | 0.01                 |
|            | Third   | 0.25     | 0.02      | 0.09        | 0.04              | 0.1      | 0.03                 | 0.27             | 0.03                    | 0.18                 |

| percentile | Cluster | RCP 8.5  |           |             |                   |          |                      |                  |                         |                      |
|------------|---------|----------|-----------|-------------|-------------------|----------|----------------------|------------------|-------------------------|----------------------|
|            |         | Latitude | Longitude | Global Heat | Ocean Circulation | Salinity | Sea surface Pressure | Surface Pressure | Sea Surface Temperature | Vertical Land Motion |
| 5          | First   | 0.25     | 0.11      | 0.1         | 0.17              | 0.11     | 0.04                 | 0.04             | 0.04                    | 0.14                 |
|            | Second  | 0.01     | 0.09      | 0.05        | 0.77              | 0.02     | 0                    | 0                | 0.03                    | 0.01                 |
|            | Third   | 0.31     | 0.07      | 0.02        | 0.02              | 0.36     | 0.01                 | 0.13             | 0.03                    | 0.04                 |
| 50         | First   | 0.18     | 0.17      | 0.12        | 0.12              | 0.13     | 0.03                 | 0.04             | 0.01                    | 0.19                 |
|            | Second  | 0.01     | 0.09      | 0.03        | 0.81              | 0.03     | 0                    | 0                | 0.01                    | 0.01                 |
|            | Third   | 0.49     | 0.05      | 0.1         | 0.03              | 0.08     | 0.03                 | 0.07             | 0.03                    | 0.1                  |
| 95         | First   | 0.25     | 0.12      | 0.1         | 0.14              | 0.13     | 0.04                 | 0.05             | 0.02                    | 0.16                 |
|            | Second  | 0        | 0.09      | 0.04        | 0.82              | 0.02     | 0                    | 0                | 0.01                    | 0                    |
|            | Third   | 0.22     | 0.23      | 0.08        | 0.01              | 0.05     | 0.05                 | 0.06             | 0.05                    | 0.24                 |

Table S5. Parameters of HTF ML algorithms.

| HTF Thresholds           |                |                      |               |
|--------------------------|----------------|----------------------|---------------|
|                          |                | number of estimators | maximum depth |
| RCP 4.5, 5th Percentile  | West Coast     | 140                  | 7             |
|                          | Gulf/SE Coasts | 130                  | 10            |
|                          | NE Coast       | 130                  | 9             |
| RCP 4.5, 50th Percentile | West Coast     | 150                  | 7             |
|                          | Gulf/SE Coasts | 150                  | 10            |
|                          | NE Coast       | 160                  | 9             |
| RCP 4.5, 95th Percentile | West Coast     | 140                  | 7             |
|                          | Gulf/SE Coasts | 100                  | 10            |
|                          | NE Coast       | 170                  | 9             |
| RCP 8.5, 5th Percentile  | West Coast     | 130                  | 7             |
|                          | Gulf/SE Coasts | 170                  | 10            |
|                          | NE Coast       | 130                  | 10            |
| RCP 8.5, 50th Percentile | West Coast     | 110                  | 7             |
|                          | Gulf/SE Coasts | 170                  | 10            |
|                          | NE Coast       | 160                  | 9             |
| RCP 8.5, 95th Percentile | West Coast     | 140                  | 7             |
|                          | Gulf/SE Coasts | 160                  | 10            |
|                          | NE Coast       | 140                  | 10            |

Table S6. Evaluation metrics of HTF ML algorithms under different scenarios; a) with considering coastal elevation and continental shelf slope, b) without considering coastal elevation and continental shelf slope

| a)         |         | RCP 4.5 |           |      |      | RCP 8.5 |           |      |      |
|------------|---------|---------|-----------|------|------|---------|-----------|------|------|
| percentile | Cluster | MAE     | R Squared | NSE  | KGE  | MAE     | R Squared | NSE  | KGE  |
| 5          | First   | 0.02    | 0.71      | 0.69 | 0.74 | 0.02    | 0.69      | 0.66 | 0.74 |
|            | Second  | 0.07    | 0.59      | 0.56 | 0.66 | 0.06    | 0.59      | 0.56 | 0.69 |
|            | Third   | 0.08    | 0.52      | 0.45 | 0.68 | 0.09    | 0.44      | 0.31 | 0.61 |
| 50         | First   | 0.03    | 0.67      | 0.64 | 0.69 | 0.02    | 0.71      | 0.68 | 0.72 |
|            | Second  | 0.07    | 0.58      | 0.56 | 0.67 | 0.07    | 0.57      | 0.54 | 0.67 |
|            | Third   | 0.09    | 0.48      | 0.41 | 0.62 | 0.09    | 0.49      | 0.39 | 0.64 |
| 95         | First   | 0.03    | 0.68      | 0.65 | 0.69 | 0.02    | 0.69      | 0.66 | 0.71 |
|            | Second  | 0.07    | 0.55      | 0.52 | 0.68 | 0.07    | 0.55      | 0.51 | 0.66 |
|            | Third   | 0.09    | 0.47      | 0.39 | 0.62 | 0.08    | 0.5       | 0.43 | 0.65 |
| b)         |         | RCP 4.5 |           |      |      | RCP 8.5 |           |      |      |
| percentile | Cluster | MAE     | R Squared | NSE  | KGE  | MAE     | R Squared | NSE  | KGE  |
| 5          | First   | 0.02    | 0.79      | 0.77 | 0.83 | 0.01    | 0.82      | 0.8  | 0.87 |
|            | Second  | 0.06    | 0.63      | 0.59 | 0.72 | 0.06    | 0.66      | 0.63 | 0.75 |
|            | Third   | 0.07    | 0.59      | 0.54 | 0.72 | 0.08    | 0.52      | 0.42 | 0.68 |
| 50         | First   | 0.01    | 0.86      | 0.85 | 0.89 | 0.01    | 0.82      | 0.79 | 0.85 |
|            | Second  | 0.06    | 0.64      | 0.6  | 0.73 | 0.06    | 0.67      | 0.64 | 0.73 |
|            | Third   | 0.07    | 0.54      | 0.48 | 0.68 | 0.07    | 0.57      | 0.51 | 0.71 |
| 95         | First   | 0.01    | 0.82      | 0.8  | 0.84 | 0.01    | 0.85      | 0.83 | 0.87 |
|            | Second  | 0.06    | 0.62      | 0.56 | 0.72 | 0.06    | 0.62      | 0.58 | 0.73 |
|            | Third   | 0.07    | 0.56      | 0.51 | 0.69 | 0.07    | 0.56      | 0.48 | 0.7  |

Table S7. Feature importance of HTF ML algorithms under different scenarios.

|            |         | RCP 4.5  |           |             |                |                         |                   |
|------------|---------|----------|-----------|-------------|----------------|-------------------------|-------------------|
| percentile | Cluster | Latitude | Longitude | Tidal Range | Sea Level Rise | Continental Shelf Slope | Coastal Elevation |
| 5          | First   | 0.39     | 0.19      | 0.15        | 0.19           | 0.03                    | 0.05              |
|            | Second  | 0.18     | 0.5       | 0.09        | 0.1            | 0.06                    | 0.07              |
|            | Third   | 0.26     | 0.23      | 0.24        | 0.17           | 0.05                    | 0.04              |
| 50         | First   | 0.38     | 0.21      | 0.16        | 0.17           | 0.03                    | 0.05              |
|            | Second  | 0.17     | 0.5       | 0.08        | 0.12           | 0.06                    | 0.07              |
|            | Third   | 0.29     | 0.21      | 0.25        | 0.15           | 0.06                    | 0.05              |
| 95         | First   | 0.49     | 0.22      | 0.17        | 0.04           | 0.03                    | 0.05              |
|            | Second  | 0.17     | 0.51      | 0.09        | 0.1            | 0.06                    | 0.07              |
|            | Third   | 0.29     | 0.22      | 0.24        | 0.15           | 0.06                    | 0.05              |

|            |         | RCP 8.5  |           |             |                |                         |                   |
|------------|---------|----------|-----------|-------------|----------------|-------------------------|-------------------|
| percentile | Cluster | Latitude | Longitude | Tidal Range | Sea Level Rise | Continental Shelf Slope | Coastal Elevation |
| 5          | First   | 0.38     | 0.2       | 0.16        | 0.18           | 0.03                    | 0.05              |
|            | Second  | 0.17     | 0.49      | 0.1         | 0.11           | 0.06                    | 0.07              |
|            | Third   | 0.24     | 0.16      | 0.18        | 0.28           | 0.07                    | 0.05              |
| 50         | First   | 0.38     | 0.21      | 0.16        | 0.17           | 0.03                    | 0.05              |
|            | Second  | 0.17     | 0.5       | 0.1         | 0.1            | 0.06                    | 0.07              |
|            | Third   | 0.28     | 0.22      | 0.24        | 0.16           | 0.06                    | 0.04              |
| 95         | First   | 0.4      | 0.21      | 0.15        | 0.18           | 0.02                    | 0.04              |
|            | Second  | 0.17     | 0.5       | 0.09        | 0.1            | 0.06                    | 0.07              |
|            | Third   | 0.3      | 0.22      | 0.25        | 0.12           | 0.07                    | 0.05              |

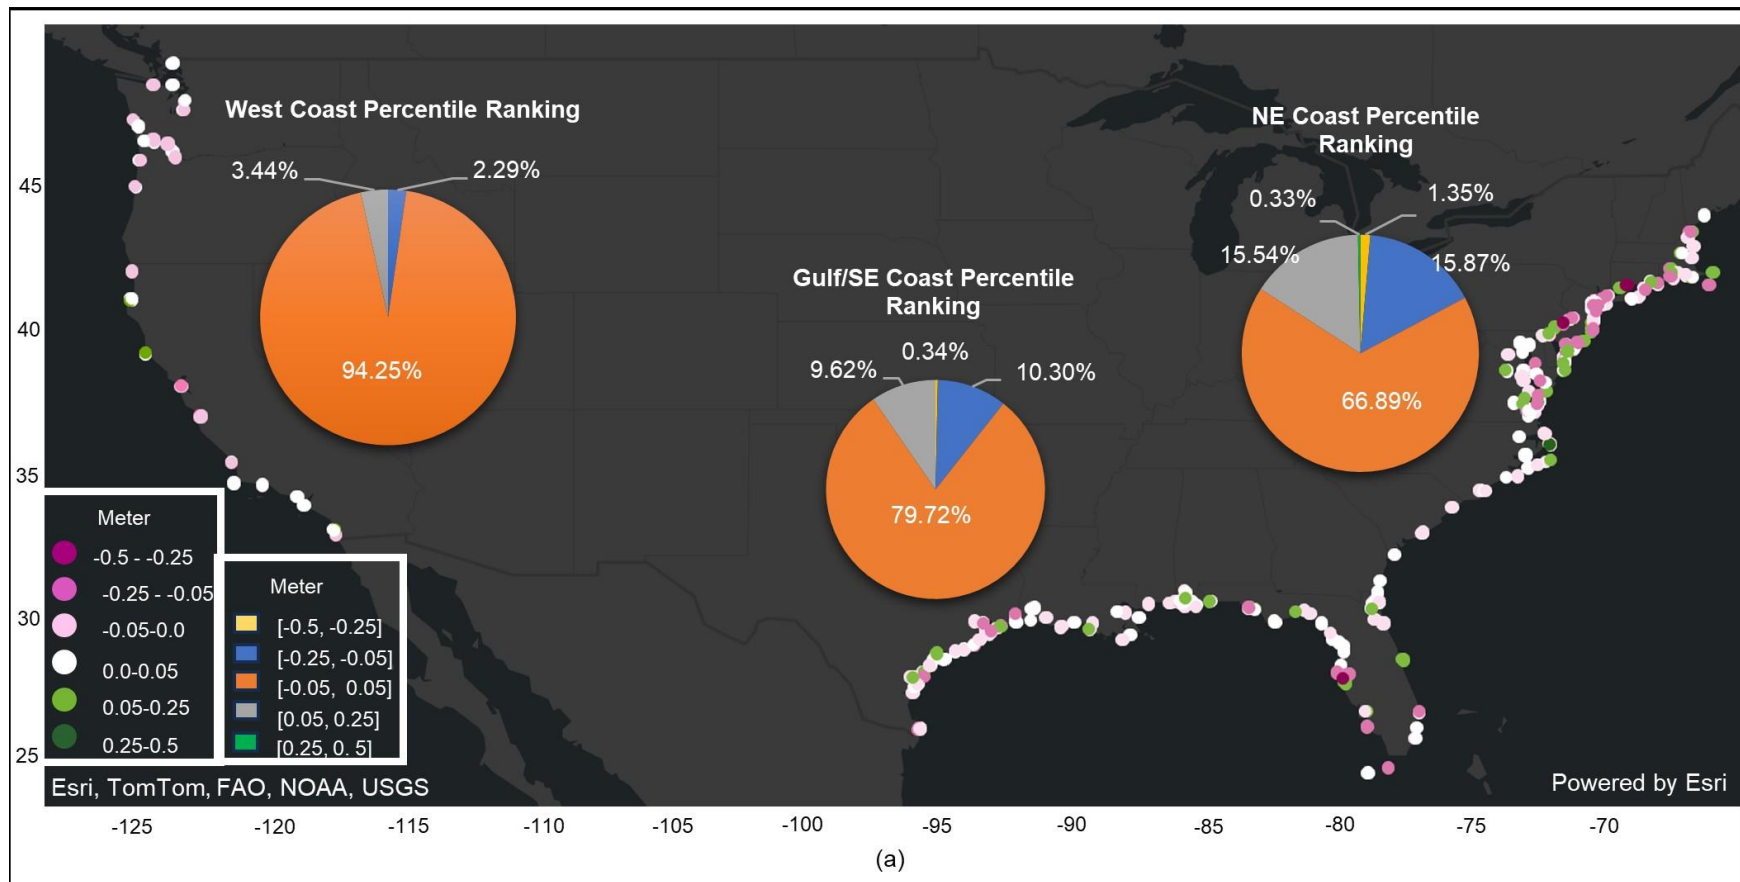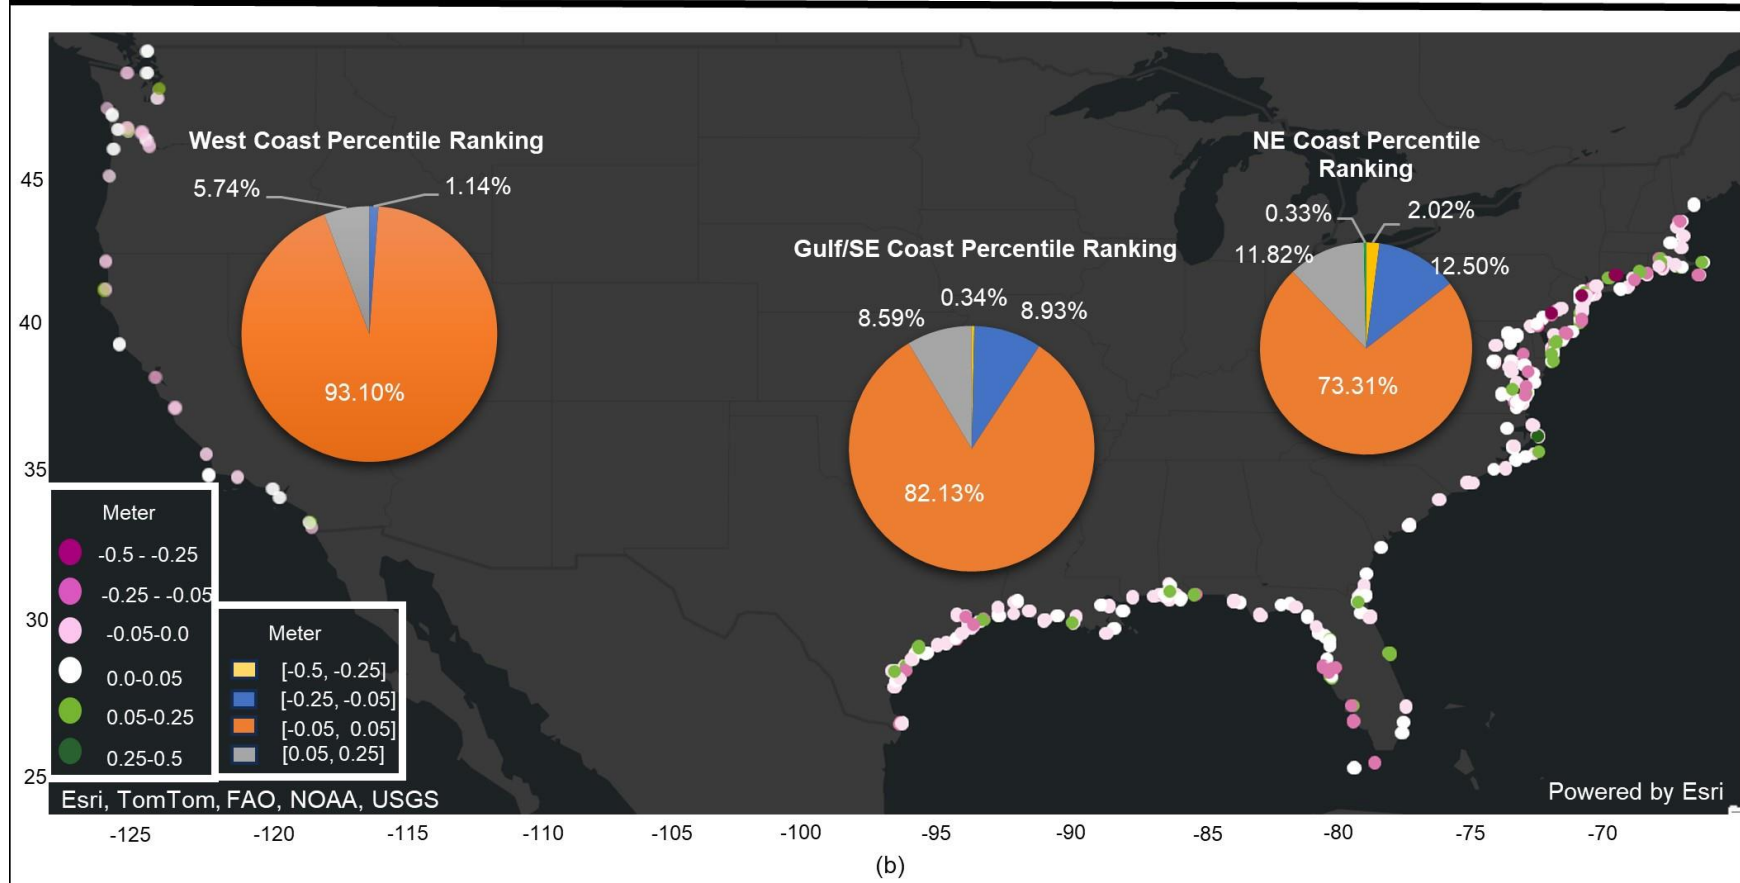

Figure S3. Percentile ranking of the difference between the official and ML-predicted thresholds a) with the coastal elevation and continental shelf slope, b) without the coastal elevation and continental shelf slope as input features. The points show the amount of difference.

Table S8. The average validation evaluation metrics of a) SLR Rates, b) HTF Thresholds with elevation and slope, c) HTF Thresholds without elevation and slope

a)

| percentile | Cluster | RCP 4.5 |           |      |      | RCP 8.5 |           |      |      |
|------------|---------|---------|-----------|------|------|---------|-----------|------|------|
|            |         | MAE     | R Squared | NSE  | KGE  | MAE     | R Squared | NSE  | KGE  |
| 5          | First   | 0.63    | 0.76      | 0.69 | 0.74 | 0.52    | 0.77      | 0.75 | 0.77 |
|            | Second  | 0.37    | 0.94      | 0.93 | 0.92 | 0.38    | 0.94      | 0.92 | 0.9  |
|            | Third   | 0.23    | 0.9       | 0.89 | 0.91 | 0.41    | 0.89      | 0.86 | 0.85 |
| 50         | First   | 0.54    | 0.77      | 0.74 | 0.82 | 0.54    | 0.72      | 0.72 | 0.81 |
|            | Second  | 0.32    | 0.95      | 0.95 | 0.94 | 0.27    | 0.97      | 0.96 | 0.95 |
|            | Third   | 0.29    | 0.85      | 0.8  | 0.85 | 0.25    | 0.86      | 0.82 | 0.86 |
| 95         | First   | 0.59    | 0.76      | 0.72 | 0.82 | 0.56    | 0.74      | 0.74 | 0.82 |
|            | Second  | 0.3     | 0.95      | 0.94 | 0.94 | 0.26    | 0.96      | 0.96 | 0.96 |
|            | Third   | 0.25    | 0.86      | 0.85 | 0.89 | 0.46    | 0.77      | 0.69 | 0.78 |

b)

| percentile | Cluster | RCP 4.5 |           |      |      | RCP 8.5 |           |      |      |
|------------|---------|---------|-----------|------|------|---------|-----------|------|------|
|            |         | MAE     | R Squared | NSE  | KGE  | MAE     | R Squared | NSE  | KGE  |
| 5          | First   | 0.05    | 0.43      | 0.33 | 0.5  | 0.05    | 0.45      | 0.35 | 0.52 |
|            | Second  | 0.08    | 0.38      | 0.35 | 0.5  | 0.09    | 0.37      | 0.31 | 0.5  |
|            | Third   | 0.14    | 0.34      | 0.28 | 0.45 | 0.15    | 0.3       | 0.2  | 0.45 |
| 50         | First   | 0.06    | 0.47      | 0.36 | 0.5  | 0.05    | 0.44      | 0.33 | 0.5  |
|            | Second  | 0.08    | 0.39      | 0.33 | 0.51 | 0.08    | 0.4       | 0.32 | 0.5  |
|            | Third   | 0.13    | 0.33      | 0.26 | 0.44 | 0.14    | 0.34      | 0.25 | 0.45 |
| 95         | First   | 0.05    | 0.46      | 0.34 | 0.52 | 0.05    | 0.46      | 0.34 | 0.54 |
|            | Second  | 0.08    | 0.4       | 0.34 | 0.5  | 0.08    | 0.39      | 0.33 | 0.5  |
|            | Third   | 0.13    | 0.3       | 0.25 | 0.4  | 0.14    | 0.29      | 0.21 | 0.4  |

c)

| percentile | Cluster | RCP 4.5 |           |      |      | RCP 8.5 |           |      |      |
|------------|---------|---------|-----------|------|------|---------|-----------|------|------|
|            |         | MAE     | R Squared | NSE  | KGE  | MAE     | R Squared | NSE  | KGE  |
| 5          | First   | 0.05    | 0.49      | 0.38 | 0.59 | 0.05    | 0.51      | 0.39 | 0.6  |
|            | Second  | 0.09    | 0.43      | 0.38 | 0.51 | 0.09    | 0.41      | 0.34 | 0.51 |
|            | Third   | 0.13    | 0.35      | 0.28 | 0.46 | 0.15    | 0.31      | 0.19 | 0.44 |
| 50         | First   | 0.04    | 0.52      | 0.42 | 0.6  | 0.05    | 0.5       | 0.38 | 0.58 |
|            | Second  | 0.08    | 0.44      | 0.4  | 0.54 | 0.08    | 0.44      | 0.38 | 0.54 |
|            | Third   | 0.13    | 0.36      | 0.27 | 0.48 | 0.12    | 0.39      | 0.3  | 0.49 |
| 95         | First   | 0.05    | 0.5       | 0.39 | 0.6  | 0.05    | 0.5       | 0.38 | 0.6  |
|            | Second  | 0.08    | 0.42      | 0.36 | 0.54 | 0.08    | 0.43      | 0.38 | 0.53 |
|            | Third   | 0.13    | 0.33      | 0.24 | 0.44 | 0.14    | 0.3       | 0.21 | 0.4  |
